# Supplementary material for: Tunable phase transition temperature and nonlinear optical properties of organic–inorganic hybrid perovskites enabled by dimensional engineering
Source: Royal Society of Chemistry journal article supplement (doi:10.1039/d2tc03497b), 2022-01-01
Supplement: d2tc03497b1.pdf [file d2tc03497b1.pdf]

**Tunable Phase Transition Temperature and Nonlinear  
Optical Property of Organic-Inorganic Hybrid Perovskites  
Enabled by Dimensional Engineering**

Qiang-Qiang Jia,<sup>a</sup> Hao-Fei Ni,<sup>a</sup> Meng-Meng Lun,<sup>b</sup> Li-Yan Xie,<sup>\*a</sup> Hai-Feng Lu,<sup>\*a</sup>  
Da-Wei Fu,<sup>\*a,b</sup> and Qiang Guo<sup>\*a</sup>

<sup>1</sup> Institute for Science and Applications of Molecular Ferroelectrics, Key Laboratory of the Ministry of Education for Advanced Catalysis Materials, Zhejiang Normal University, Jinhua, 321004, People's Republic of China.

<sup>2</sup> Ordered Matter Science Research Center, Jiangsu Key Laboratory for Science and Applications of Molecular Ferroelectrics, Southeast University, Nanjing 211189, P.R. China.

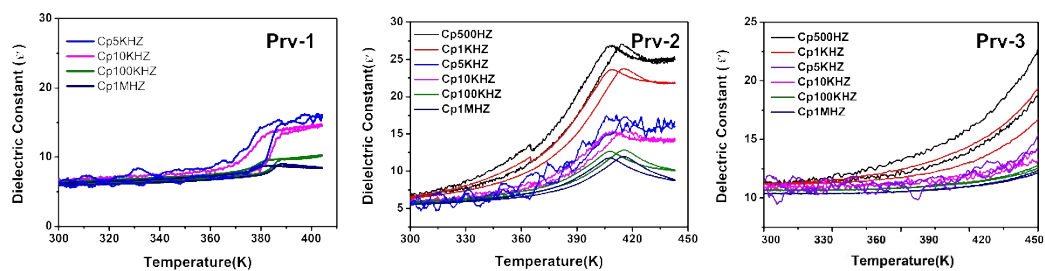

Figure S1. The dielectric constants of three perovskite materials in different frequencies.

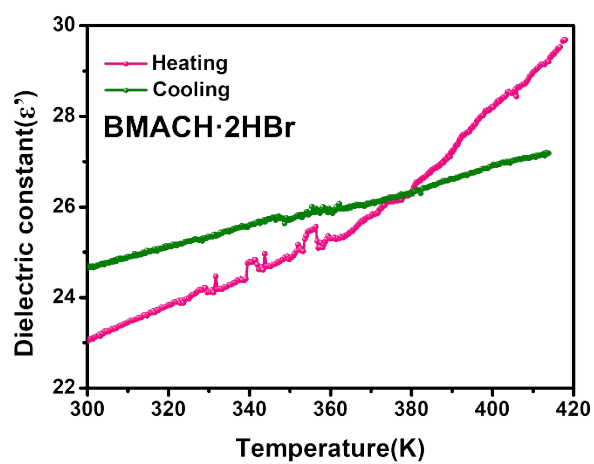

Figure S2. The temperature dependent dielectric constant of BMACH·2HBr at 1 MHz.

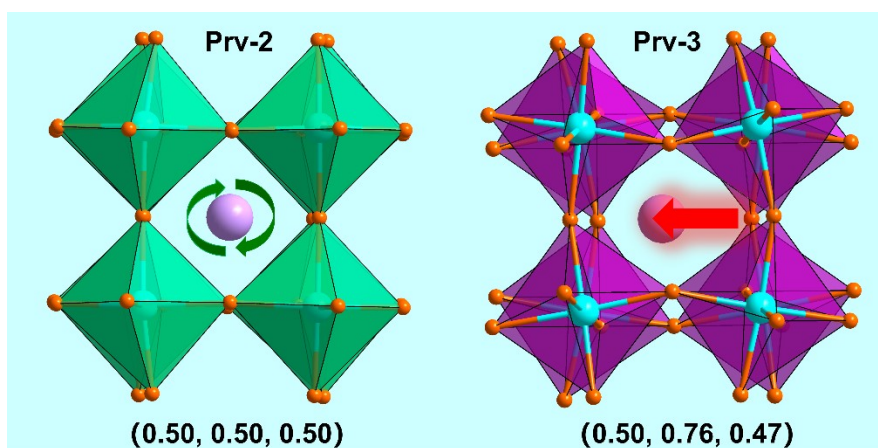

Figure S3. Structural changes of inorganic frameworks and mineralizers in Prv-2 and Prv-3.

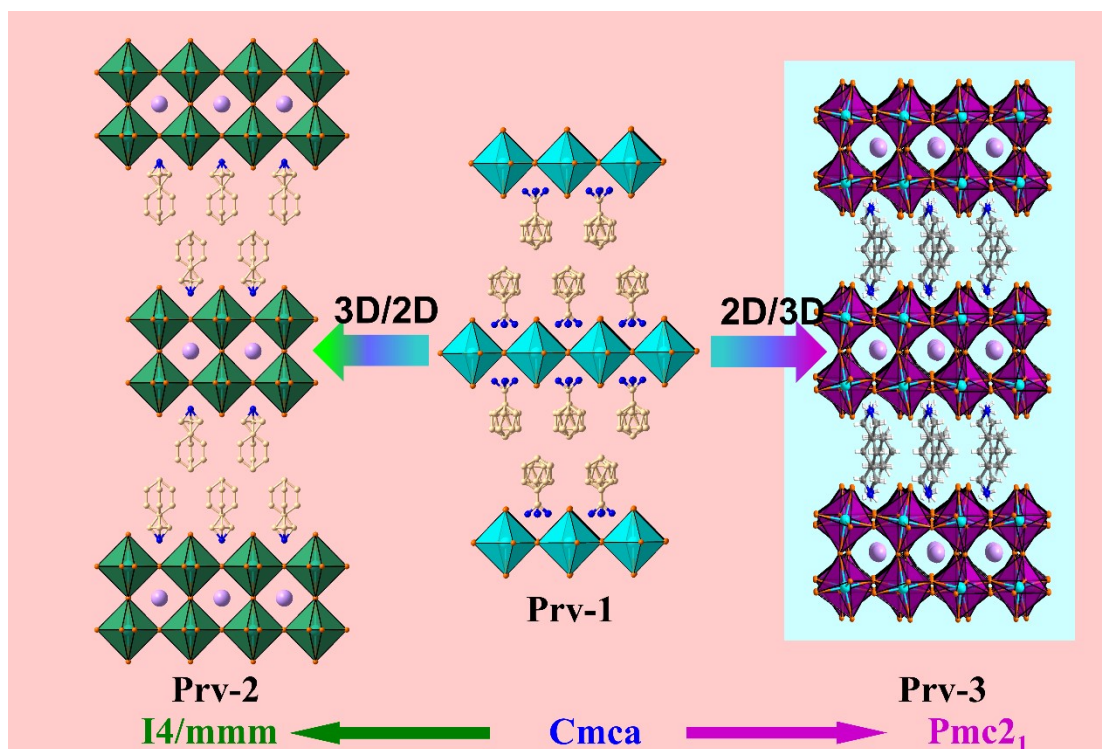

Figure S4. High temperature phase (HTP) structures of three compounds.

#### Hirshfeld surface analysis

Hirshfeld surface was generated by the CIF document of crystallographic data based on CrystalExplorer software with HF functional. The standard resolution is used for the all Hirshfeld surface generation (The intensity of molecular interaction is mapped onto the Hirshfeld surface by using the respective red-blue-white scheme: where the white or green regions exactly correspond to the distance of Van der Waals contacts, the blue regions correspond to longer contacts, and the red regions represent closer contacts. Besides, each coordinate in 2D fingerprint is calculated by the distance between the inner ( $d_i$ ) and outer ( $d_e$ ) nearest atoms of the Hirshfeld  $d_{norm}$  surface. Notably, the Hirshfeld surface and 2D fingerprint corresponding to each structure are unique. The normalized contact distance  $d_{norm}$  is calculated by the *van der Waals* (vdW) radii based on two atoms external ( $r_e^{vdW}$ ) and internal ( $r_i^{vdW}$ ) to the surface:

$$d_{norm} = \frac{d_i - r_i^{vdW}}{r_i^{vdW}} + \frac{d_e - r_e}{r_e^{vdW}}$$

$d_{norm}$  surface is used for the identification of close intermolecular interactions.

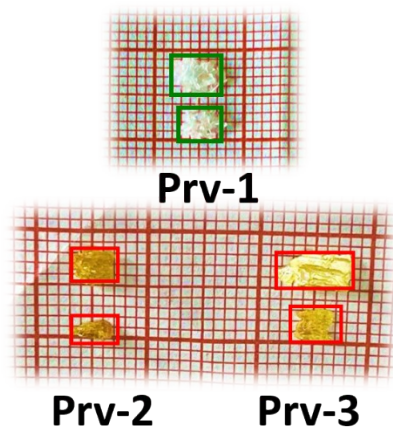

Figure S5. Large size single crystal images.

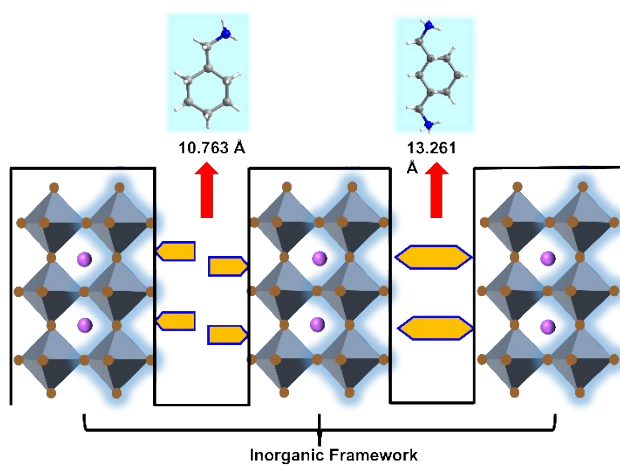

Figure S6. A diagrammatic sketch of organic barriers and inorganic wells.

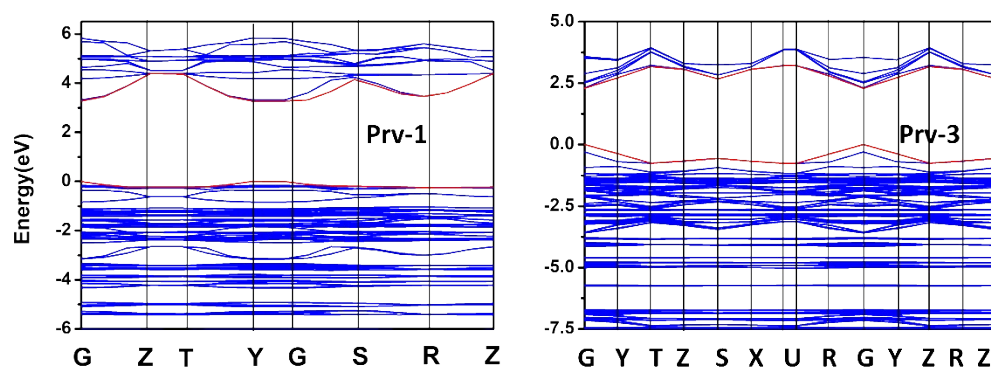

Figure S7. The band structures of Prv-1 and Prv-3.

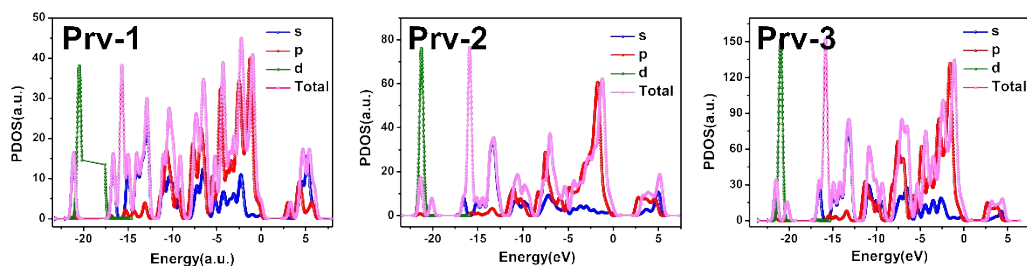

Figure S8. Partial density of states (PDOS) of three compounds.

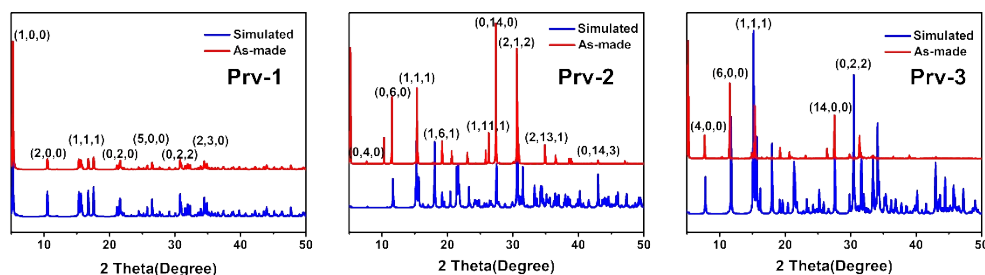

Figure S9. Powder X-Ray diffraction (PXRD) patterns of three perovskite materials.

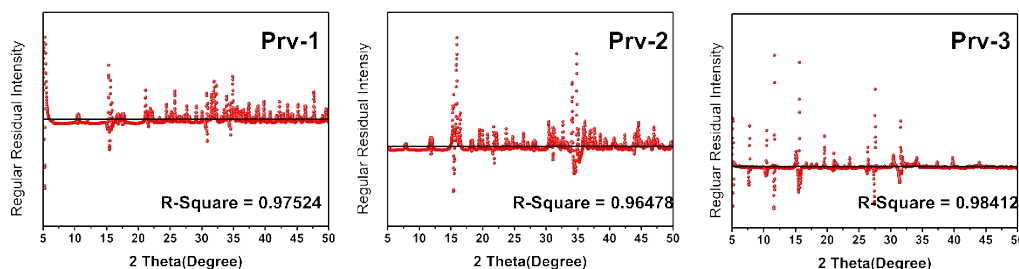

Figure S10. Calculation of three compounds lattice distances from powder X-Ray diffraction data according to *Scherrer* equation.

Calculation details of lattice distances for three compounds.

| Compounds |         |          |           |         |          |           |         |          |
|-----------|---------|----------|-----------|---------|----------|-----------|---------|----------|
| Prv-1     |         |          | Prv-2     |         |          | Prv-3     |         |          |
| $2\theta$ | width   | Distance | $2\theta$ | width   | Distance | $2\theta$ | width   | Distance |
| 5.19122   | 0.0826  | 112.539  | 7.88072   | 0.10518 | 108.328  | 5.2547    | 0.11909 | 76.6564  |
| 7.7116    | 0.18219 | 57.7074  | 11.89388  | 0.1156  | 72.83588 | 10.52049  | 0.10928 | 139.6417 |
| 10.42006  | 0.25734 | 64.67064 | 15.42902  | 0.17363 | 329.2962 | 15.52729  | 0.57318 | 153.7132 |
| 11.66144  | 0.14455 | 61.10793 | 18.30335  | 0.11285 | 73.1434  | 16.77627  | 0.11105 | 140.586  |
| 15.61129  | 0.33498 | 490.8275 | 21.80274  | 0.2473  | 3410.683 | 17.58675  | 0.11134 | 88.4388  |
| 19.59875  | 0.00427 | 1999     | 25.69534  | 0.11092 | 74.58983 | 21.62207  | 0.18375 | 235.737  |
| 20.9906   | 0.36768 | 45       | 28.13892  | 0.1131  | 1038.751 | 26.49988  | 0.10569 | 96.99704 |
| 26.36991  | 0.29492 | 33.06    | 31.07925  | 0.13656 | 59.0384  | 30.81623  | 0.25241 | 32.9604  |
| 27.49843  | 0.21665 | 96.9321  | 34.70802  | 1.08113 | 97.7909  | 34.49352  | 0.22292 | 1114.44  |
| 31.52351  | 0.42126 | 18.8857  | 32.26007  | 0.13413 | 64.959   | 44.00683  | 0.13179 | 60.315   |
|           |         |          | 40.9944   | 0.1139  | 908.967  | 42.13675  |         |          |
|           |         |          | 43.87532  | 0.13172 | 60.429   | 39.68966  |         |          |

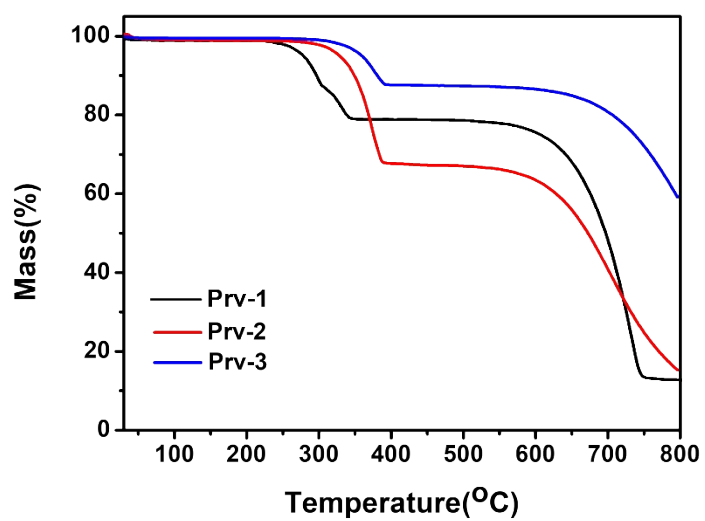

Figure S11. Thermal stability analysis of chemical structures of three compounds.

**Table S1** Crystallographic data and structural refinement details of compounds

| Compounds                      | Prv-2                                                             | Prv-2                                                | Prv-3                                                            |
|--------------------------------|-------------------------------------------------------------------|------------------------------------------------------|------------------------------------------------------------------|
| CCDC Code                      | 2193783                                                           | 2193781                                              | 2193782                                                          |
| Formula                        | $2(\text{C}_7\text{H}_{16}\text{N})\cdot\text{CsPb}_2\text{Br}_7$ | $2(\text{C}_7\text{N})\cdot\text{CsPb}_2\text{Br}_7$ | $\text{C}_8\text{H}_{20}\text{N}_2\cdot\text{CsPb}_2\text{Br}_7$ |
| Fw                             | 1335.07                                                           | 1329.31                                              | 1250.92                                                          |
| Temp(K)                        | 300                                                               | 413                                                  | 200                                                              |
| Crystal Syst                   | Orthorhombic                                                      | Tetragonal                                           | Orthorhombic                                                     |
| Space group                    | <i>Pnma</i>                                                       | <i>I4/mmm</i>                                        | <i>Pmc2<sub>1</sub></i>                                          |
| a(Å)                           | 8.2272 (17)                                                       | 5.8488 (4)                                           | 17.920 (3)                                                       |
| b(Å)                           | 45.395 (10)                                                       | 5.8488 (4)                                           | 7.9645 (12)                                                      |
| c(Å)                           | 8.290 (2)                                                         | 46.264 (4)                                           | 8.4836 (14)                                                      |
| $\alpha$                       | 90                                                                | 90                                                   | 90                                                               |
| $\beta$                        | 90                                                                | 90                                                   | 100.611                                                          |
| $\gamma$                       | 90                                                                | 90                                                   | 90                                                               |
| V(Å <sup>3</sup> )             | 3096.1 (12)                                                       | 1582.6 (3)                                           | 1210.8 (3)                                                       |
| Z                              | 4                                                                 | 2                                                    | 2                                                                |
| $\mu(\text{mm}^{-1})$          | 21.06                                                             | 20.60                                                | 26.91                                                            |
| GOF on $F^2$                   | 1.003                                                             | 1.144                                                | 1.069                                                            |
| $R_1[[I > 2\sigma(I)]]^a$      | 0.0392                                                            | 0.0396                                               | 0.0252                                                           |
| $wR_2$ (all data) <sup>b</sup> | 0.0878                                                            | 0.1228                                               | 0.0574                                                           |

**Table S2.** The important band lengths and band angles.

| Prv-2                                      |             |                                           |             |
|--------------------------------------------|-------------|-------------------------------------------|-------------|
| LTP                                        |             | HTP                                       |             |
| Pb01—Br03                                  | 2.9760 (13) | Pb1—Br4                                   | 3.0136 (9)  |
| Pb01—Br04                                  | 2.9990 (12) | Pb1—Br3                                   | 2.9863 (9)  |
| Pb01—Br04 <sup>i</sup>                     | 3.0056 (12) | Pb1—Br3 <sup>ii</sup>                     | 2.9863 (9)  |
| Pb01—Br05                                  | 2.9761 (12) | Pb1—Br3 <sup>iv</sup>                     | 2.9863 (9)  |
| Pb01—Br05 <sup>ii</sup>                    | 2.9787 (12) | Pb1—Br3 <sup>v</sup>                      | 2.9863 (9)  |
| Pb01—Br2                                   | 3.0169 (8)  | Pb1—Br3 <sup>vi</sup>                     | 2.9863 (9)  |
| N008—C00B                                  | 1.473 (13)  | Pb1—Br3 <sup>vii</sup>                    | 2.9863 (9)  |
| C00A—C00B                                  | 1.502 (15)  | Pb1—Br2                                   | 2.935 (3)   |
| C00A—C6                                    | 1.539 (14)  | C1—C1 <sup>vi</sup>                       | 1.26 (4)    |
| C6—C13                                     | 1.499 (17)  | C1—C1 <sup>xii</sup>                      | 1.78 (6)    |
| C8—C10                                     | 1.476 (16)  | C4—C4 <sup>xiv</sup>                      | 1.698 (10)  |
| C10—C12                                    | 1.476 (17)  | C5—C4 <sup>xiv</sup>                      | 1.494 (10)  |
| C12—C13                                    | 1.49 (2)    | C5—C4                                     | 1.494 (10)  |
| Br03—Pb01—Br04                             | 92.40 (3)   | C3—C4                                     | 1.495 (10)  |
| Br03—Pb01—Br04 <sup>i</sup>                | 85.59 (3)   | N1—C1                                     | 1.48 (2)    |
| Br03—Pb01—Br05                             | 90.33 (3)   | C2—C3                                     | 1.487 (9)   |
| Br03—Pb01—Br05 <sup>ii</sup>               | 97.50 (3)   | Br3 <sup>vii</sup> —Pb1—Br4               | 89.07 (6)   |
| Br03—Pb01—Br2                              | 173.90 (4)  | Br3—Pb1—Br4                               | 89.07 (6)   |
| Br04—Pb01—Br04 <sup>i</sup>                | 88.63 (2)   | Br3—Pb1—Br3 <sup>ii</sup>                 | 113.27 (15) |
| Br04 <sup>i</sup> —Pb01—Br2                | 88.35 (4)   | Br3 <sup>i</sup> —Pb1—Br3 <sup>iv</sup>   | 66.70 (15)  |
| Br04—Pb01—Br2                              | 88.11 (4)   | Br3—Pb1—Br3 <sup>iv</sup>                 | 156.64 (16) |
| Br05 <sup>ii</sup> —Pb01—Br04 <sup>i</sup> | 176.70 (3)  | Br3 <sup>v</sup> —Pb1—Br3 <sup>vi</sup>   | 113.27 (15) |
| Br05—Pb01—Br04                             | 175.76 (3)  | Br3 <sup>vii</sup> —Pb1—Br3 <sup>iv</sup> | 113.27 (16) |



**Table S3.** The important band lengths and band angles.

| Prv-3                         |             |
|-------------------------------|-------------|
| LTP                           |             |
| Pb01—Br03                     | 2.9784 (13) |
| Pb01—Br03 <sup>ii</sup>       | 2.9991 (14) |
| Pb01—Br04                     | 3.0126 (14) |
| Pb01—Br04 <sup>iii</sup>      | 3.0266 (13) |
| Pb01—Br05                     | 2.9058 (13) |
| Pb01—Br06                     | 3.0320 (7)  |
| N008—C4                       | 1.457 (16)  |
| C1—C2                         | 1.508 (16)  |
| C007—C1                       | 1.547 (19)  |
| C007—C4                       | 1.501 (16)  |
| C007—C009                     | 1.521 (14)  |
| C1—C2                         | 1.508 (16)  |
| Br03—Pb01—Br04 <sup>iii</sup> | 177.93 (4)  |
| Br03 <sup>ii</sup> —Pb01—Br06 | 86.67 (5)   |
| Br03—Pb01—Br06                | 87.38 (4)   |
| Br04—Pb01—Br04 <sup>iii</sup> | 91.159 (18) |
| Br04—Pb01—Br06                | 91.30 (5)   |
| Br05—Pb01—Br03 <sup>ii</sup>  | 88.48 (4)   |
| Br05—Pb01—Br03                | 93.53 (3)   |
| Br05—Pb01—Br04 <sup>iii</sup> | 88.53 (4)   |
| Br05—Pb01—Br04                | 93.53 (4)   |
| Br05—Pb01—Br06                | 175.11 (6)  |
